# Supplementary material for: Ion mediated charge carrier transport in a novel radiation sensitive polyoxometalate–polymer hybrid
Source: Royal Society of Chemistry journal article supplement (doi:10.1039/c6ra04182e), 2016-01-01
Supplement: c6ra04182e1.pdf [file c6ra04182e1.pdf]

## Electronic supplementary information

### **Ion mediated Charge Carrier Transport in a Novel Radiation Sensitive Polyoxometalate-Polymer Hybrid**

Abdus Salam Sarkar, Vishwanath Kalyani, Kenneth E. Gonsalves, Chullikkattil P. Pradeep and  
Suman Kalyan Pal\*

*School of Basic Sciences, Indian Institute of Technology Mandi, Mandi-175001, Himachal  
Pradesh, India.*

\*Corresponding Author: Tel.: +91 1905 267040; Fax: +91 1905 237924

E-mail: [suman@iitmandi.ac.in](mailto:suman@iitmandi.ac.in)

#### **Materials and Measurements**

Indium tin oxide (ITO) coated glass slides and aluminum (99.999%) were purchased from Sigma-Aldrich, USA. Hybrid polymer (POM-MAPDST) was synthesized and characterized following our previous report.<sup>1</sup> Phosphate buffer solution (PBS) and hydrochloric acid (HCL) were procured from Alfa Aesar, USA and Merck, India, respectively. Before device fabrication, ITO coated glass slides with a sheet resistivity of 8-12  $\Omega/\square$  were first patterned via chemical etching and then cleaned through ultra-sonication in DI water, acetone, and isopropyl alcohol. POM-MAPDST hybrid polymer (0.8 wt %) solution in acetonitrile was spin coated on ITO

coated glass substrates with a spinning rate of 5000 rpm for 60 s to achieve a thickness of about 70 nm. Finally, a 100 nm thick aluminum (Al) electrode was deposited via thermal evaporation under the chamber pressure of  $1 \times 10^{-6}$  mbar using a shadow mask. Film thicknesses were measured using NanoMap-LS stylus profilometer (Aep Technology, USA). Temperature dependent current-voltage (I-V) measurements were performed in a laboratory-made variable temperature cryostat using a programmable source meter (Keithley 2400). Electrochemical (LSV and EIS) measurements were performed on an electrochemical workstation (AutolabMetrohm). A conventional three electrode cell was used for all measurements, where POM-MAPDST or MAPDST coated ITO was used as a working, Ag/AgCl as a reference and Pt as a counter electrode. Solution pH was varied by changing the pH of 0.1M phosphate buffer solution with adding the appropriate amount of hydrochloric acid.

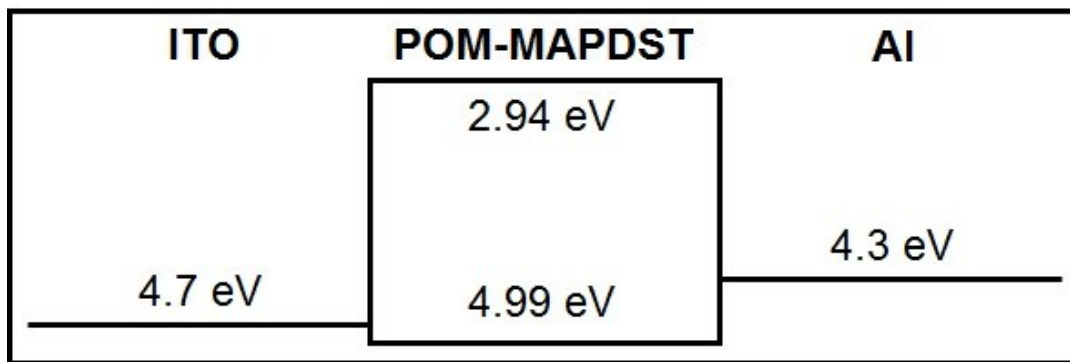

**Fig. S1** Energy level alignment of ITO, POM-MAPDST and Al in the fabricated devices.

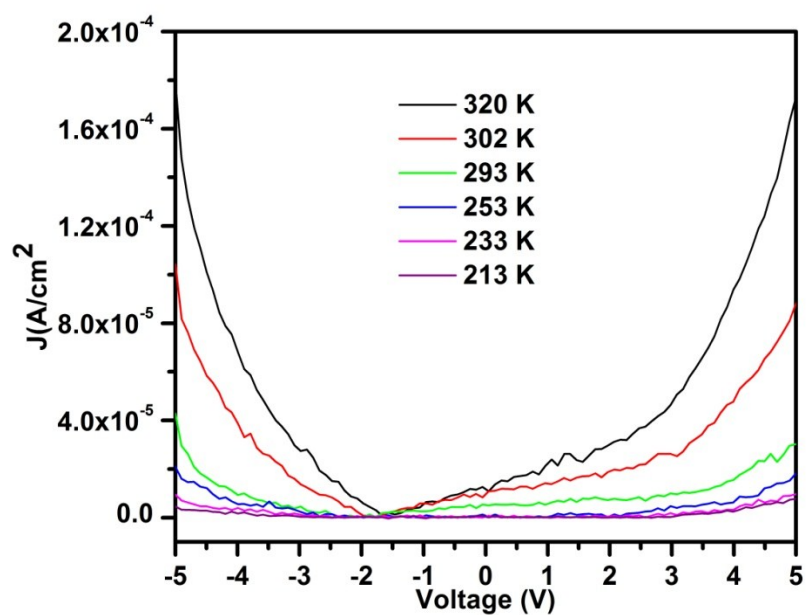

**Fig. S2** Symmetric current density-voltage (J-V) characteristic of POM-MAPDST films at different temperatures.

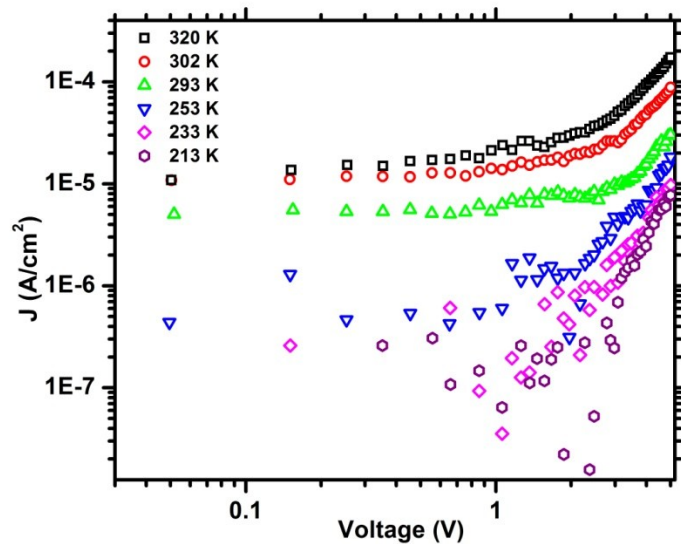

**Fig. S3** Current density versus voltage (J-V) plots for POM-polymer hybrid films in log-log scale in the temperature range 302-213 K.

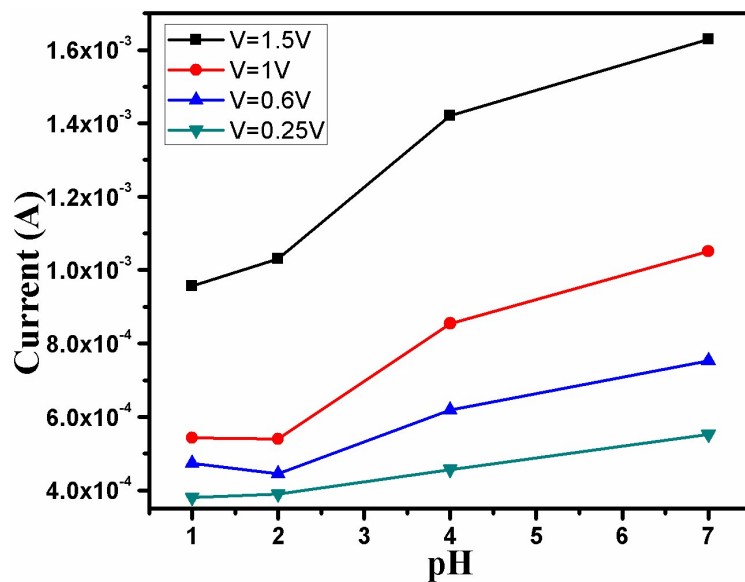

**Fig. S4** Variation of current with pH for the POM-MAPDST working electrode at particular voltages.

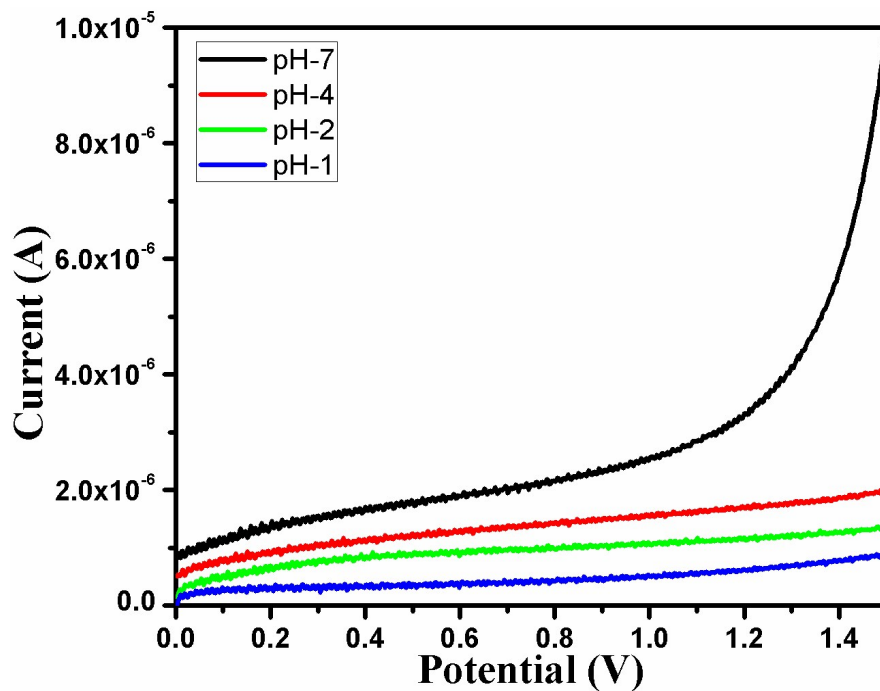

**Fig. S5** Linear sweep voltammograms of MAPDST at different pH values.

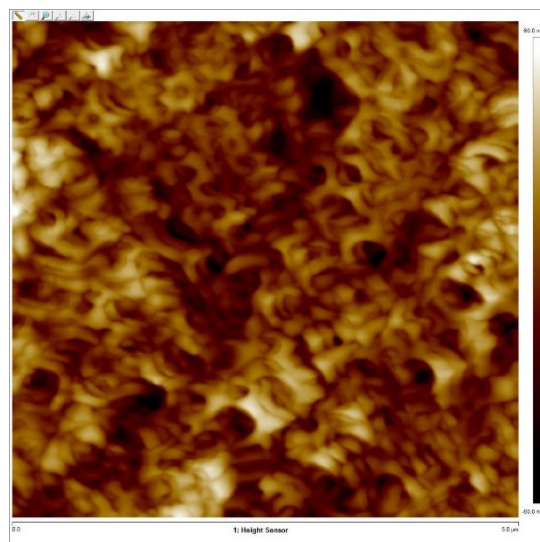

(a)

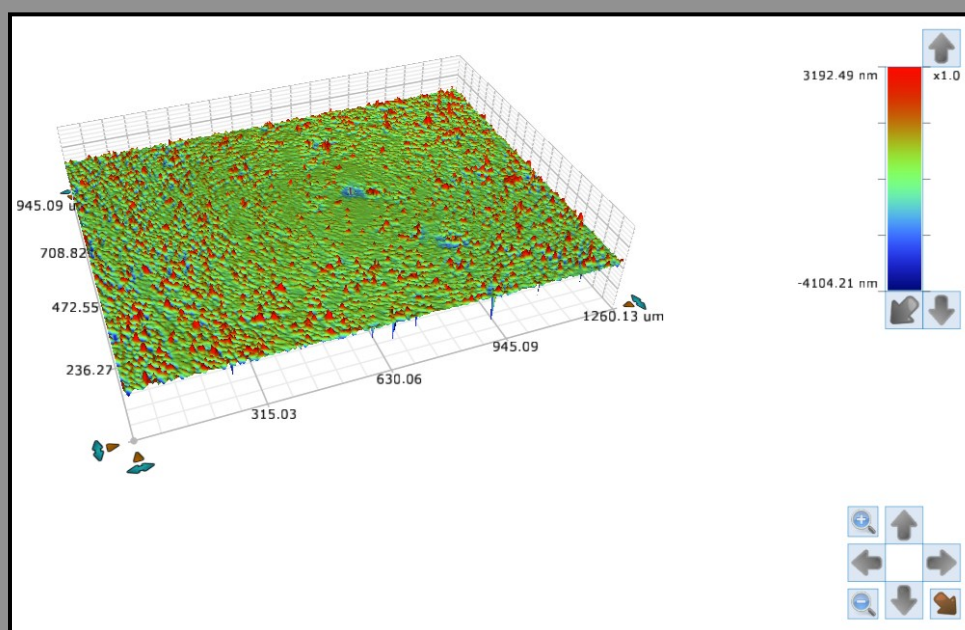

(b)

**Fig. S6** (a) AFM and (b) 3D optical images of ITO/POM-MAPDST electrode surface.

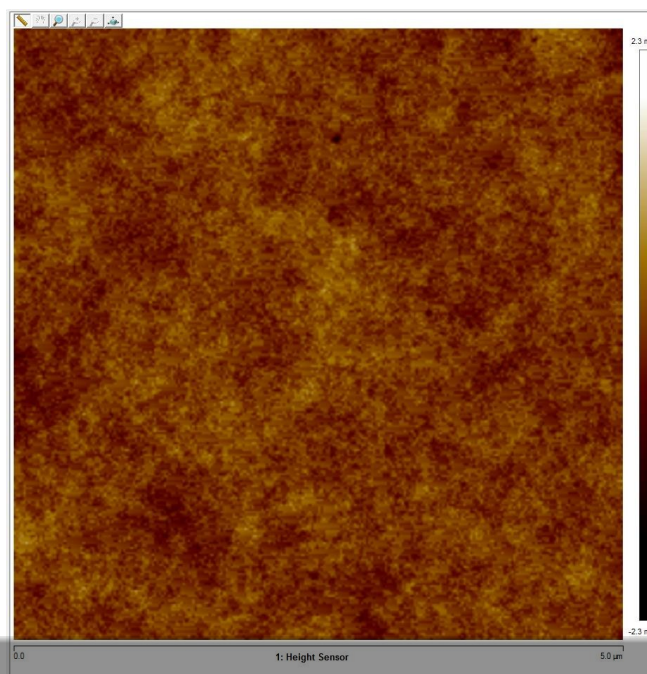

(a)

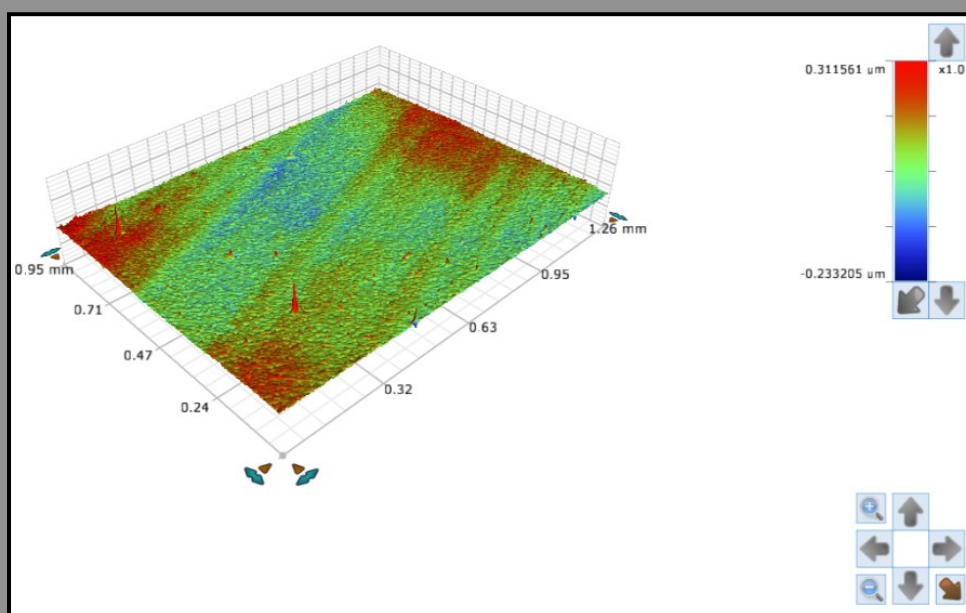

(b)

**Fig. S7** (a) AFM and (b) 3D optical images of ITO/MAPDST electrode surface.

**Table 1:** The parameters obtained from the fitting of impedance spectra using an equivalent circuit

| pH value | $R_s$ ( $\Omega$ ) | CPE (F) | $R_{ct}$ ( $K\Omega$ ) | $Z_w$     |
|----------|--------------------|---------|------------------------|-----------|
| 7        | 72.8               | 23.4    | 0.729                  | 12.5 mMho |
| 4        | 74.2               | 36.5    | 1.43                   | 1.65 mMho |
| 2        | 94.9               | 78.4    | 7.42                   | 1.10 TMho |
| 1        | 133                | 34.7    | 5.76                   | 428 uMho  |

- <sup>1</sup> V. Kalyani, V. Satyanarayana, A. S. Sarkar, A. Kumar, S. K. Pal, S. Ghosh, K. E. Gonsalves, and C. P. Pradeep, RSC Adv. **5**, 36727-36731 (2015).
